# Supplementary material for: The C-terminal tail of α-synuclein protects against aggregate replication but is critical for oligomerization
Source: PubMed Central journal article supplement (PMC8831632; doi:10.1038/s42003-022-03059-8), 2022-02-10
Supplement: 42003_2022_3059_MOESM2_ESM.pdf [file 42003_2022_3059_MOESM2_ESM.pdf]

1 The C-terminal tail of  $\alpha$ -synuclein protects against aggregate replication but  
2 is critical for oligomerization

3 **Azad Farzadfard, Jannik Nedergaard Pedersen, Georg Meisl, Arun Kumar Somavarapu, Parvez**  
4 **Alam, Louise Goksøyr, Morten Agertoug Nielsen, Adam Frederik Sander, Tuomas P.J. Knowles,**  
5 **Jan Skov Pedersen and Daniel Erik Otzen**

6  
7 **Supplementary Information**

8  
9  
10 **SI FIGURES**

11

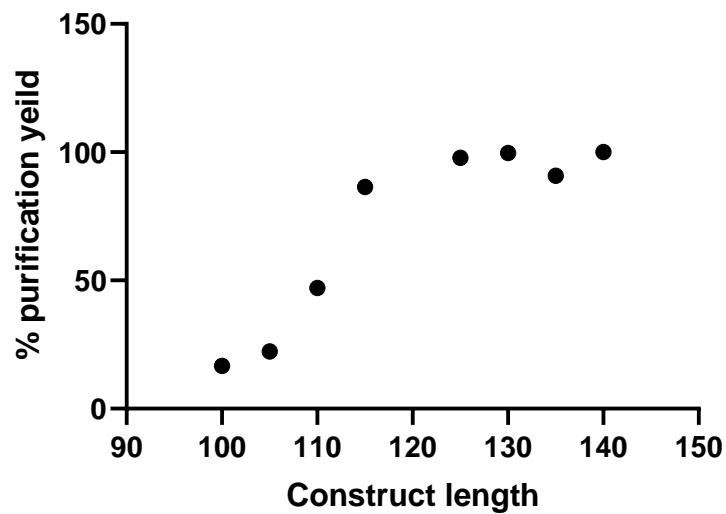

12

13 **Figure S1.** Expression yield of purified  $\alpha$ SN decreases steeply for  $\alpha$ SN110 and shorter mutants.  
14 Anion exchange chromatography was used for constructs  $\alpha$ SN-FL to  $\alpha$ SN121, and cation exchange  
15 chromatography was used for shorter constructs due to the decline in net negative charge.  $\alpha$ SN-FL  
16 typically yields 30-40 mg purified  $\alpha$ SN per L bacterial cell culture.

17

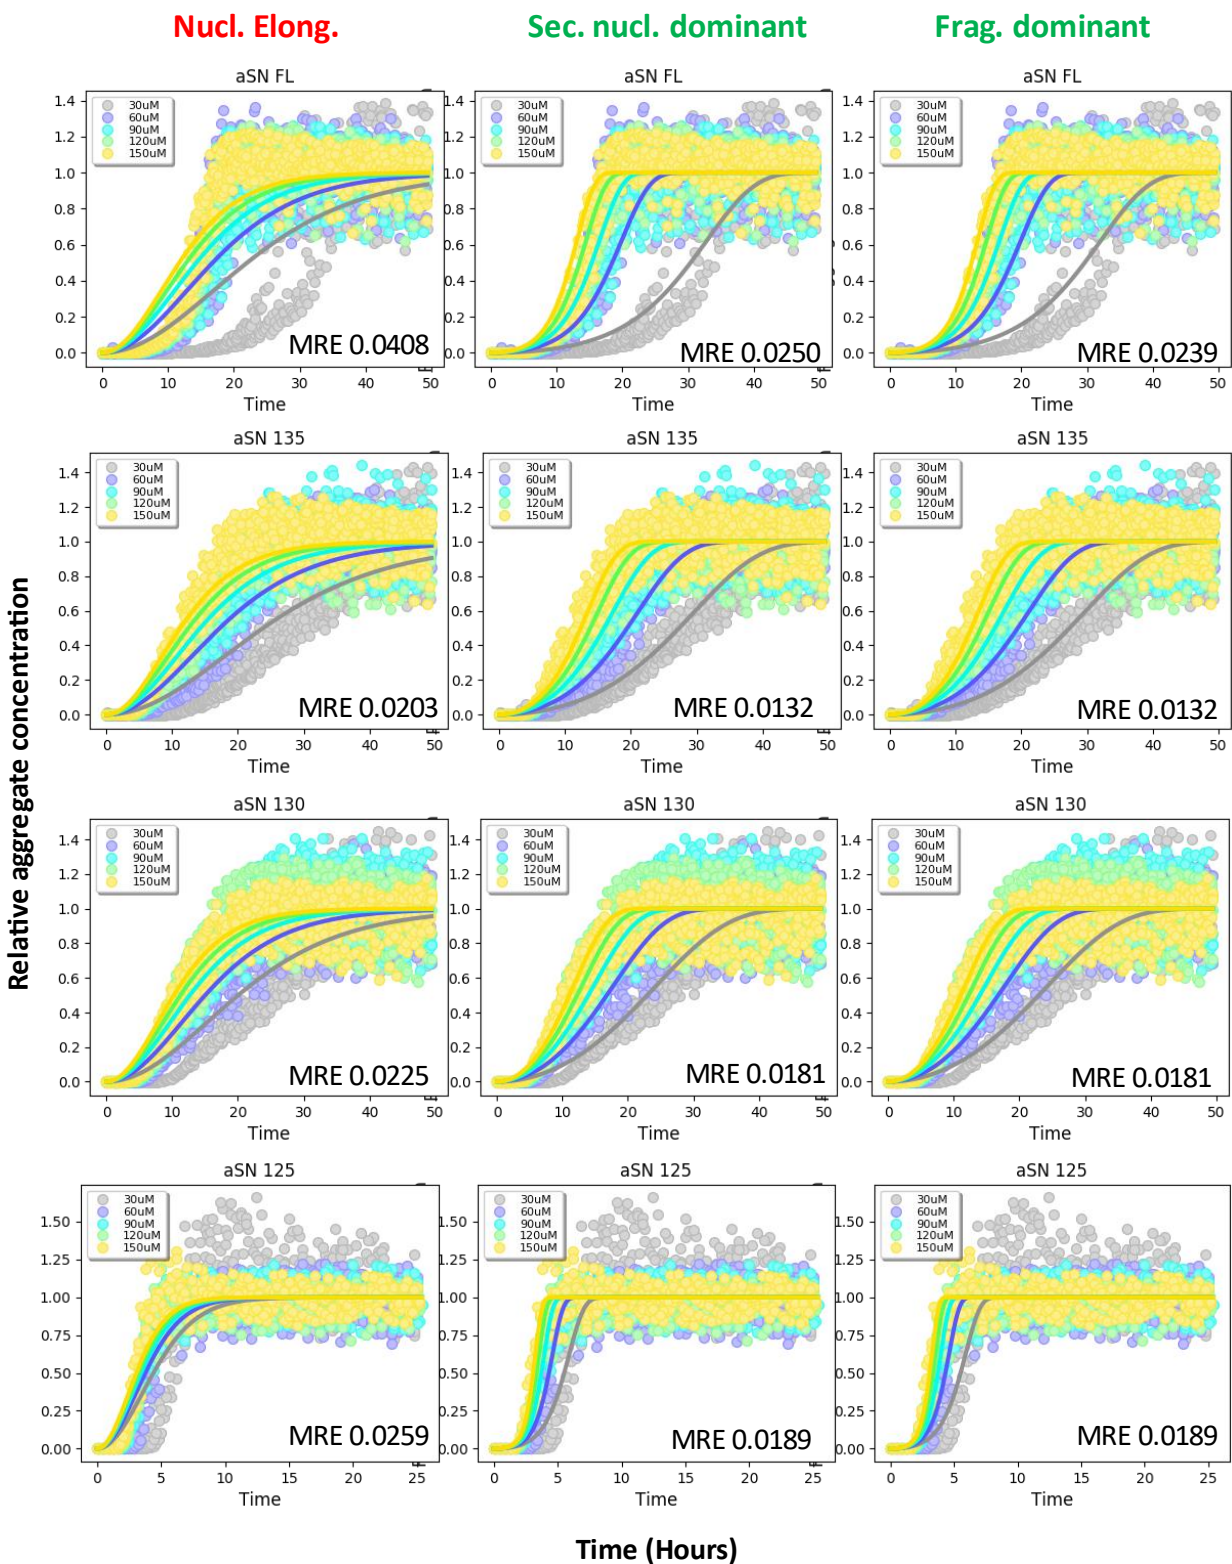

18

19 **Figure S2.** The best models to fit kinetic data for  $\alpha$ SN-FL to  $\alpha$ SN125 are the secondary nucleation  
 20 dominant model and the fragmentation dominant model, while the nucleation and elongation model  
 21 provides a poor fit. Note similar models with saturation (i.e., elongation saturation and secondary  
 22 nucleation dominant, and elongation saturation and fragmentation dominant) fit just as well. This

23 indicates that saturation does not play a significant role within the measured concentration ranges.  
24 Three replicates in three wells were used at every concentration.

25

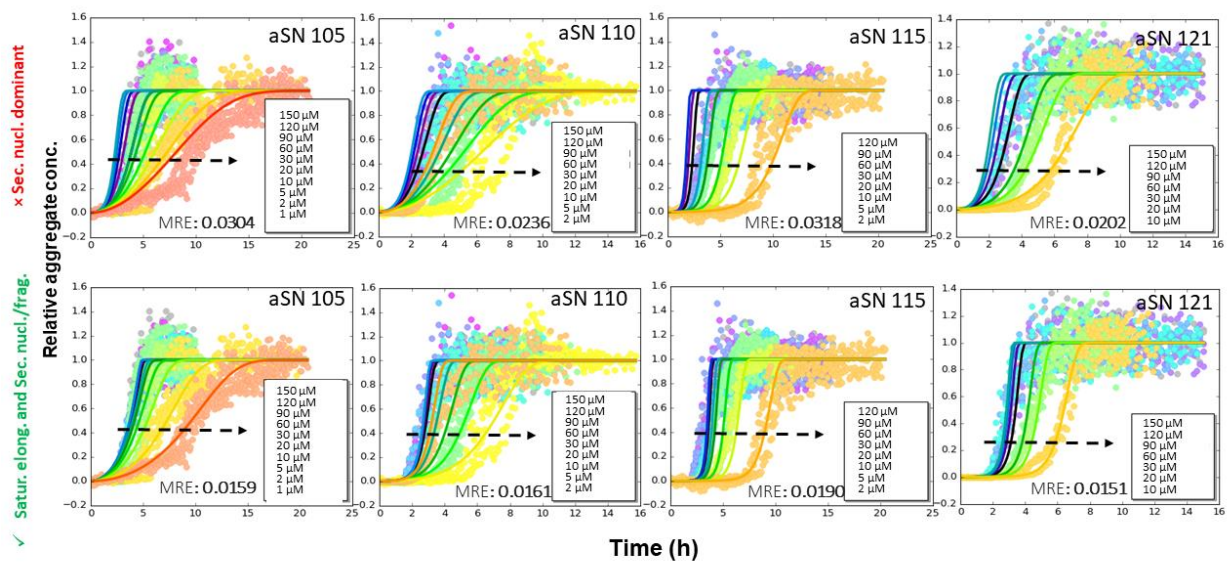

26  
 27 **Figure S3.** Comparison of “fragmentation” model (top) with “saturation elongation and  
 28 fragmentation” (bottom) for  $\alpha$ SN mutants shorter than  $\alpha$ SN125. Visual inspection along with values  
 29 of Mean Residual squared Error (MRE) provided for each fit show a better fitting when the  
 30 saturation parameter is involved. Stippled arrow indicates direction of increasing protein  
 31 concentration. Three replicates in three wells were used for every concentration.

32  
 33  
 34

35

36

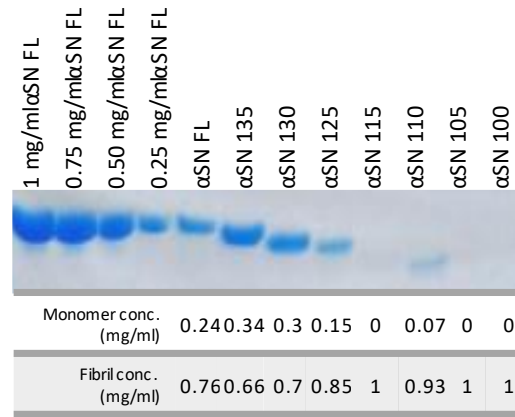

37

38 **Figure S4.** Determination of the extent of aggregation of different αSN mutants. The concentration  
39 of aggregates remaining at the end of the fibrillation experiments was measured by spinning the  
40 solution down and determining [monomer] by SDS-PAGE using a calibrated monomer sample. The  
41 fibril concentration was obtained by subtracting [monomer] from total [αSN]. The data show that  
42 there is overall a very high level of fibrillation and that truncation increases this even further.

43

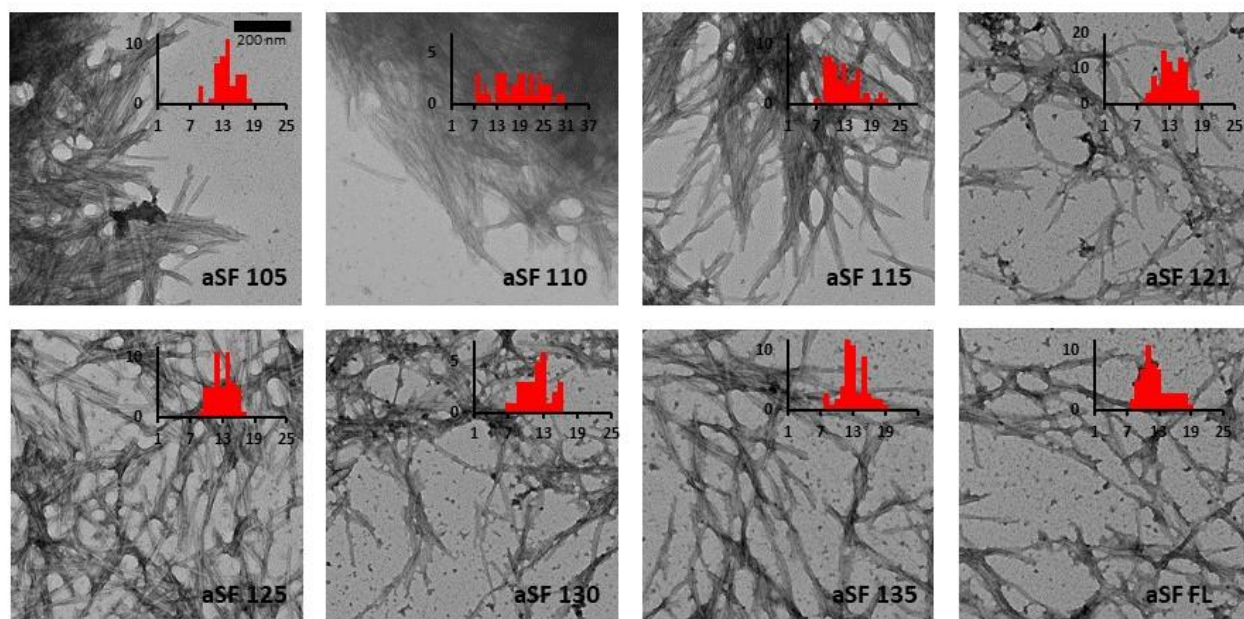

44

45 **Figure S5.** Negative stain TEM images of truncated  $\alpha$ SN fibrils ( $\alpha$ SF). Insets show frequency (y-  
 46 axis) of fibrils width in nanometer (x-axis) quantified manually with ImageJ. Scale bar shows 200  
 47 nm.

48

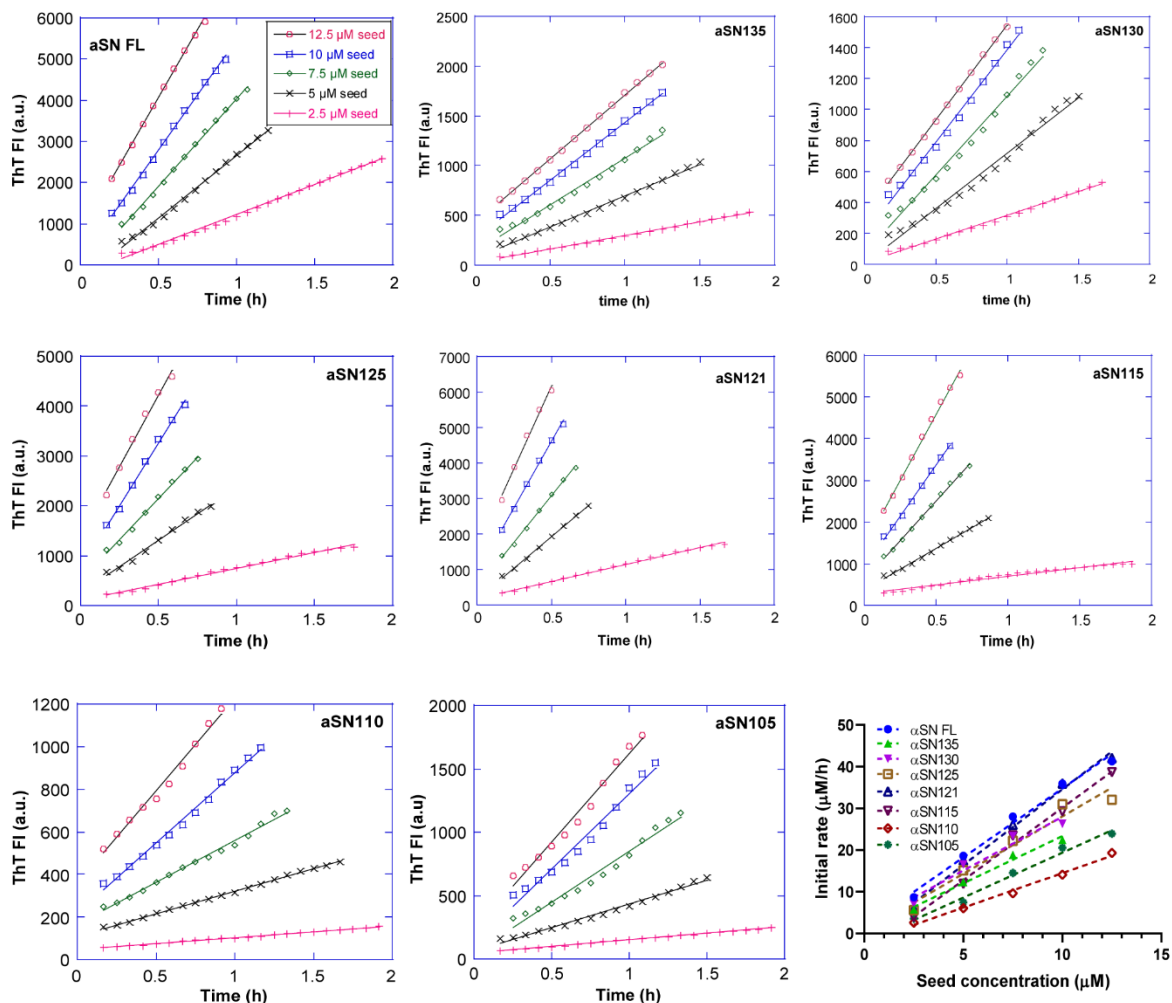

|                                 | Apparent elongation rate constant (slope) | Std. error | R <sup>2</sup> | Relative elongation rate constant |
|---------------------------------|-------------------------------------------|------------|----------------|-----------------------------------|
| <b><math>\alpha</math>SN-FL</b> | 3.30                                      | 0.21       | 0.99           | 1                                 |
| <b><math>\alpha</math>SN135</b> | 2.26                                      | 0.20       | 0.98           | 0.7                               |
| <b><math>\alpha</math>SN130</b> | 2.58                                      | 0.41       | 0.95           | 0.8                               |
| <b><math>\alpha</math>SN125</b> | 2.75                                      | 0.34       | 0.96           | 0.9                               |
| <b><math>\alpha</math>SN121</b> | 3.63                                      | 0.21       | 0.99           | 1.2                               |
| <b><math>\alpha</math>SN115</b> | 3.48                                      | 0.17       | 0.99           | 1.4                               |
| <b><math>\alpha</math>SN110</b> | 1.66                                      | 0.09       | 0.99           | 0.6                               |
| <b><math>\alpha</math>SN105</b> | 2.15                                      | 0.14       | 0.99           | 0.9                               |

50

51 **Figure S6.** Determination of elongation rates for each construct of  $\alpha$ SN. A ThT fibrillation assay  
 52 was performed in the presence of a series of seed concentrations (corresponding to 2.5 to 12.5  $\mu$ M  
 53 in monomer units) and a fixed concentration of monomer (50  $\mu$ M). In the last panel, the initial rates  
 54 of fibrillation were plotted against seed concentration to obtain the apparent elongation rate  
 55 constant. Each curve is an average of two repeats. Earlier time points were excluded due to signal

56 changes originating from thermal equilibration. Results of these fits are summarized in the Table  
57 underneath the graphs. Relative elongation rate constant is obtained from apparent elongation rate  
58 constant where saturation coefficient ( $K_E$ ) as Michaelis constant for elongation is taken into account  
59 (For more detail, see Material and Methods in the section “Analysis of fibrillation kinetics”).

60



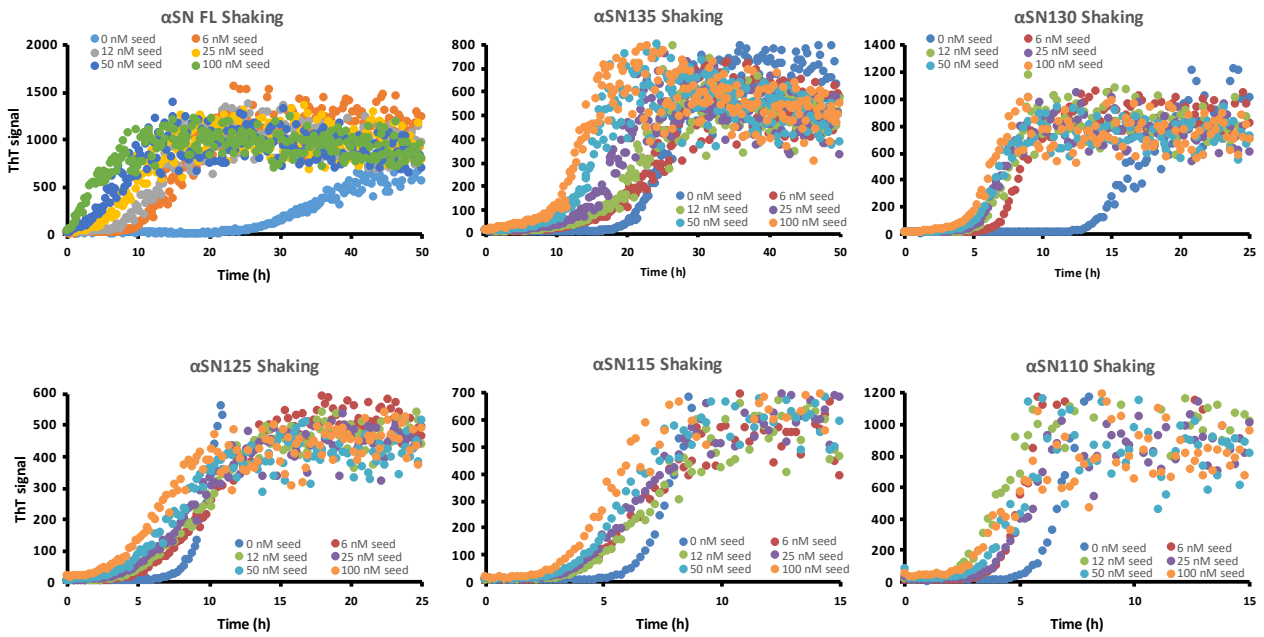

61

62 **Figure S7.** Fibrillation at low seed concentrations with shaking induces faster aggregation for aSN-  
 63 FL as well as all CTD truncated mutants. Experiments were done with 50  $\mu$ M monomer and the  
 64 mentioned concentrations of seeds corresponding to 0, 0.03, 0.06, 0.1, and 0.2% seed in PBS pH  
 65 7.4.

66

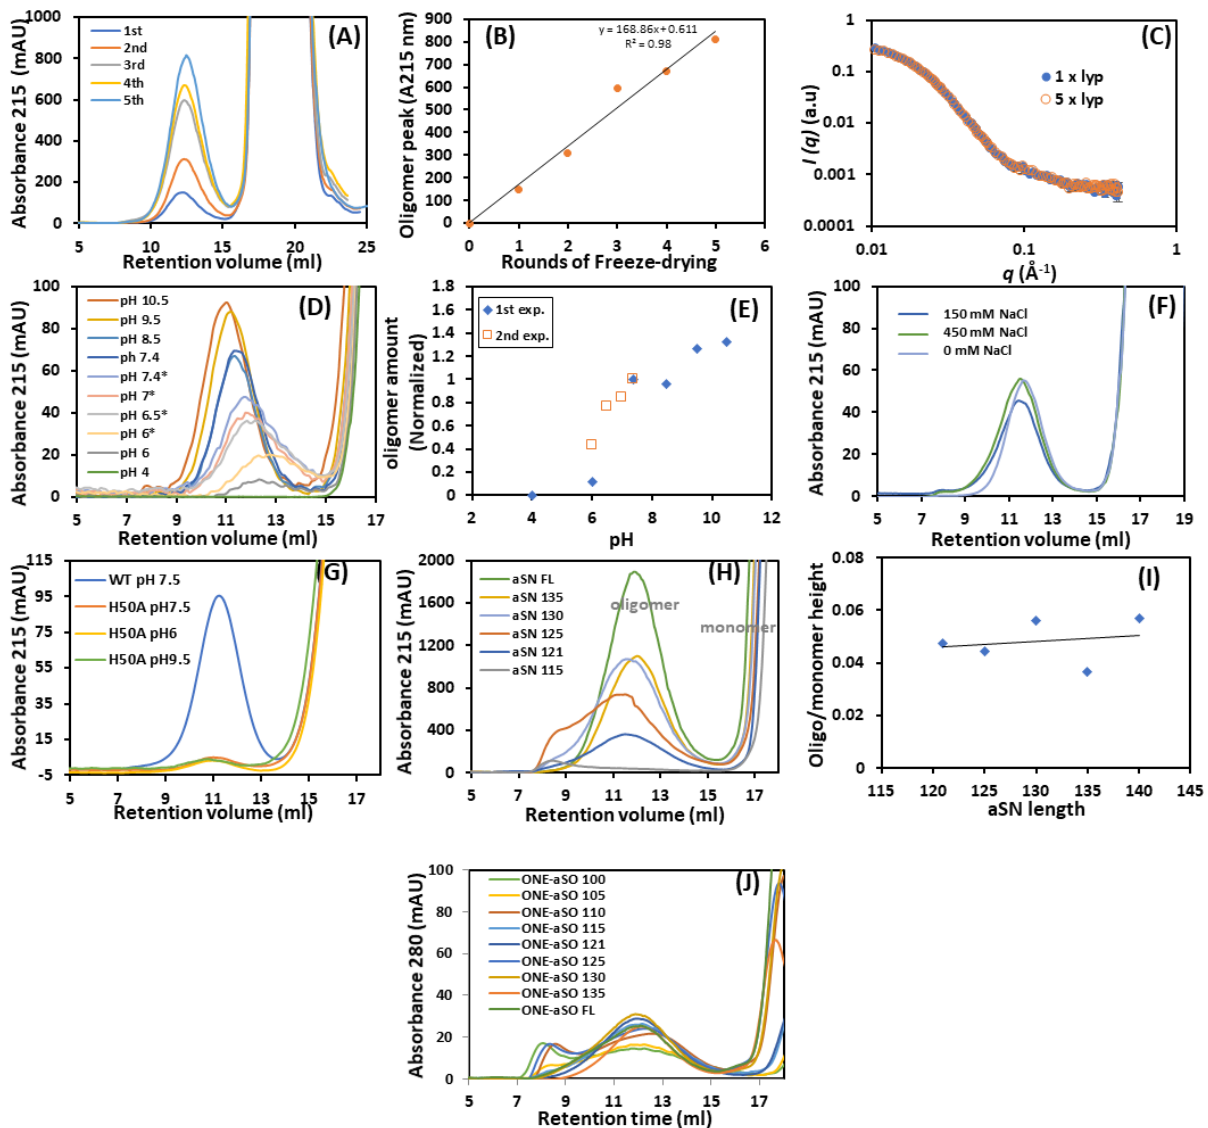

68

69

70 **Figure S8.** Oligomer formation tendency of C-terminal truncated  $\alpha$ SN constructs based on size  
 71 exclusion analysis. Data in panels A-F employ  $\alpha$ SNFL. (A, B) Each round of freeze-drying led to a  
 72 linear increase in the amount of  $\alpha$ SN oligomer ( $\alpha$ SO). (C) Oligomers of first and fifth rounds of  
 73 freeze-drying show no difference in size and shape according to SAXS data. (D, E) Oligomer  
 74 formation over a range of pHs from pH 10.5 to pH 4 shows almost no oligomer below pH 6.  
 75 Asterisks in panel D refer to another set of experiments with a different batch of starting monomers  
 76 (F) Oligomer formation in 20 mM phosphate buffer with three different NaCl concentrations. (G)  
 77 H50A  $\alpha$ SN does not form oligomers between pH 6 and 9.5 after 4 hours incubation in 37 C, 900  
 78 rpm shaking. (H) Shorter constructs do not form oligomer even after three rounds of freeze-drying.  
 79 (I) The  $\alpha$ SN constructs that form oligomer retain a constant proportion of oligomer to monomer  
 80 based on peak height. (J) Modification with ONE induces oligomerization of all truncated  $\alpha$ SNs,  
 81 leading to oligomers that elute around 12 ml just like unmodified oligomers. We also observed

82 variable amounts of a larger species eluting around 8 ml (quantified as the ratio between the peak  
 83 heights of oligomer and monomer fractions) but without any systematic trends in their formation.

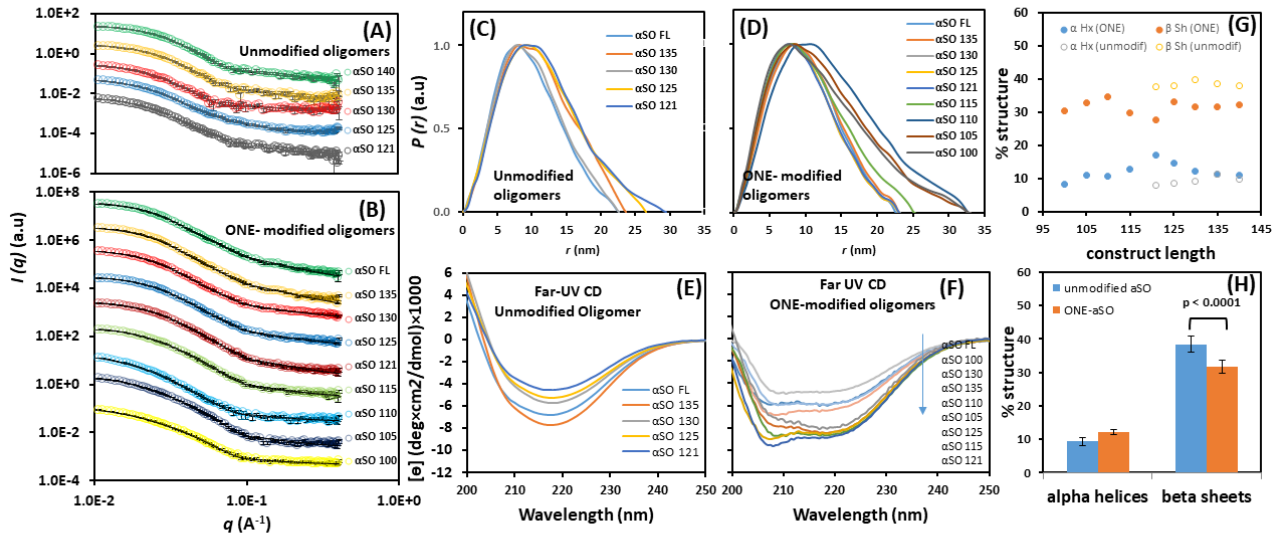

84

85 **Figure S9.** (A, B) Good fits (lines) to SAXS data of a previously developed model for the  $\alpha$ SN-FL  
 86 oligomer indicate a similar ellipsoidal shape for all oligomers with a dense core and fluffy shell. (C, D)  
 87 Model-free pair distance distribution function ( $p(r)$ ) shows generally similar ONE- and unmodified  
 88 oligomers but more elongated ONE-oligomers for the three shortest  $\alpha$ SN constructs. (E, F) secondary  
 89 structures (CD curves) of unmodified and ONE-modified oligomers of CTD truncated  $\alpha$ SN constructs  
 90 and (G) deconvolution of the CD data into components of secondary structure (<http://bestsel.elte.hu/>).  
 91 (H)  $\beta$  content of ONE- $\alpha$ SOs is slightly lower than for unmodified aSOs (D). One-way ANOVA was  
 92 used to compare the secondary structure amounts in oligomer types in panel H. Error bars show the  
 93 standard deviation for the average in each group.

94

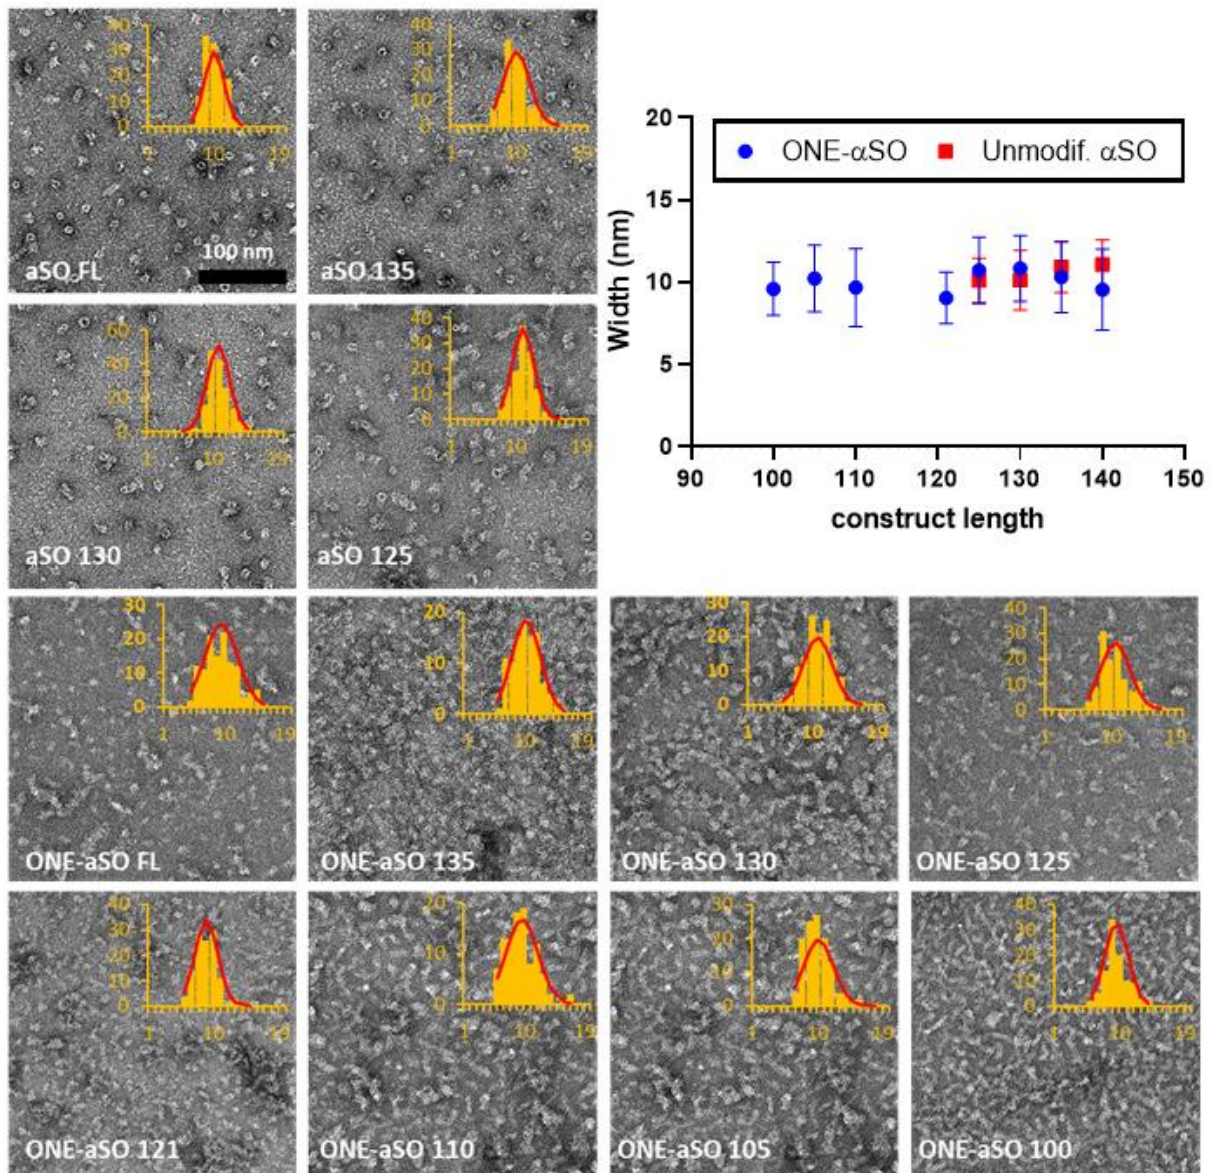

95

96 **Figure S10.** Negative stain TEM images of truncated  $\alpha$ SOs. Insets show frequency (y-axis) of  
 97 oligomer width in nanometer (x-axis) quantified manually with ImageJ. Scale bar shows 100 nm.  
 98 The plot shows the width of different oligomers (data points are average of measured width and  
 99 error bars are standard deviation).

100

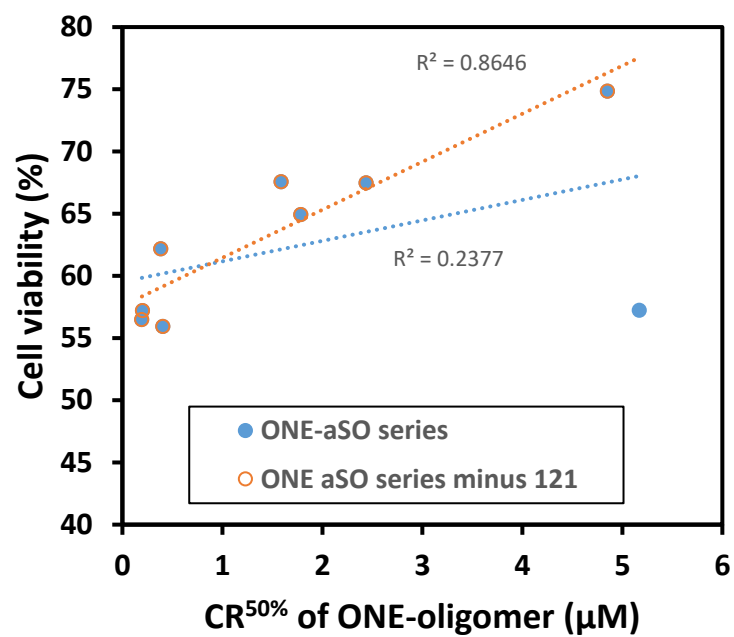

101

102 **Figure S11.** We observe a good correlation between CR<sup>50%</sup> values of ONE-oligomers and cell  
 103 viability with the single exclusion of ONE-αSO121.

104

105
