# Supplementary material for: The C-terminal tail of α-synuclein protects against aggregate replication but is critical for oligomerization
Source: PubMed Central journal article supplement (PMC8831632; doi:10.1038/s42003-022-03059-8), 2022-02-10
Supplement: 42003_2022_3059_MOESM5_ESM.pdf [file 42003_2022_3059_MOESM5_ESM.pdf]

## Description of Additional Supplementary Files

**File name:** Supplementary Data 1

**Description:** Data sets for graphs and charts in the main figures.
